# Supplementary material
Source: publisher figshare collection journal article supplement (https://acs.figshare.com/ndownloader/files/26008254)
Supplement: Supplementary file 1 [file 26008254]

# SUPPORTING INFORMATION

for

## Nucleosome Core Particles Lacking H2B or H3 Tails are Altered Structurally and have Differential Base Excision Repair Fingerprints

Paul J. Caffrey and Sarah Delaney\*

\*Department of Chemistry, Brown University, Providence, RI 02912

### Table of Contents

|                                                                                       |    |
|---------------------------------------------------------------------------------------|----|
| <b>Scheme S1.</b> Widom 601 and Internal Standard DNA Sequences .....                 | S2 |
| <b>Scheme S2.</b> Ligation Scheme for Complementary Strand Lacking $\epsilon$ A ..... | S3 |
| <b>Figure S1.</b> Native PAGE Analysis of $\epsilon$ A Containing NCPs.....           | S4 |
| <b>Figure S2.</b> Hydroxyl Radical Footprinting of NCPs.....                          | S5 |
| <b>Figure S3.</b> Denaturing PAGE analysis of AAG in NCPs and Duplex.....             | S6 |
| <b>Table S1.</b> Rotational Position of $\epsilon$ A lesions.....                     | S7 |
| <b>SUPPLEMENTARY REFERENCES</b> .....                                                 | S8 |

**Scheme S1.** Widom 601 and Internal Standard Sequences.

Designation of the strands as I or J based on the crystal structure of Vasudevan, *et al.* for the Widom 601 NCP.<sup>1</sup> εA was distributed across all A positions in the I strand.

**Lesion containing I strand:**

5'-ATC AGA ATC CCG GTG CCG AGG CCG CTC AAT TGG TCG TAG ACA GCT CTA GCA CCG  
CTT AAA CGC ACG TAC GCG CTG TCC CCC GCG TTT TAA CCG CCA AGG GGA TTA CTC  
CCT AGT CTC CAG GCA CGT GTC AGA TAT ATA CAT CGA T- 3'

**Complementary J strand:**

5'-ATC GAT GTA TAT ATC TGA CAC GTG CCT GGA GAC TAG GGA GTA ATC CCC TTG GCG  
GTT AAA ACG CGG GGG ACA GCG CGT ACG TGC GTT TAA GCG GTG CTA GAG CTG TCT  
ACG ACC AAT TGA GCG GCC TCG GCA CCG GGA TTC TGA T- 3'

**23 mer internal standard:**

5'-ATC AGA ATC CCG GTG CCG AGG CC- 3'

**92 mer internal standard:**

5'-ATC AGA ATC CCG GTG CCG AGG CCG CTC AAT TGG TCG TAG ACA GCT CTA GCA CCG  
CTT AAA CGC ACG TAC GCG CTG TCC CCC GCG TTT TAA CC- 3'

**Scheme S2.** Ligation Scheme for Complementary Strand Lacking εA.

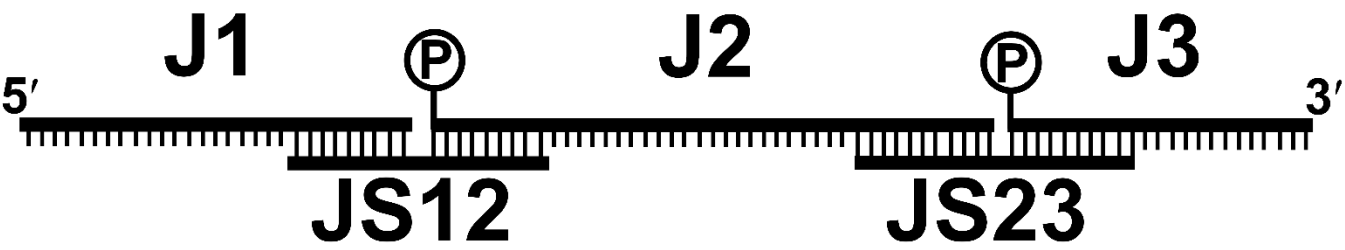

| Component | Length | Sequence (5' to 3')                                                  |
|-----------|--------|----------------------------------------------------------------------|
| J1        | 45mer  | ATCGATGTATATATCTGACACGTGCCTGGAGACTAGGGAGTAATC                        |
| J2        | 65mer  | CCCTTGGCGGTTAAACGCGGGGGACAGCGCGTACGTGCGTTTAAGC<br>GGTGCTAGAGCTGTCTAC |
| J3        | 35mer  | GACCAATTGAGCGGCCTCGGCACCGGGATTCTGAT                                  |
| JS12      | 30mer  | TTTAACCGCCAAGGGGATTACTCCCTAGTC                                       |
| JS23      | 32mer  | GCCGCTCAATTGGTCGTAGACAGCTCTAGCAC                                     |

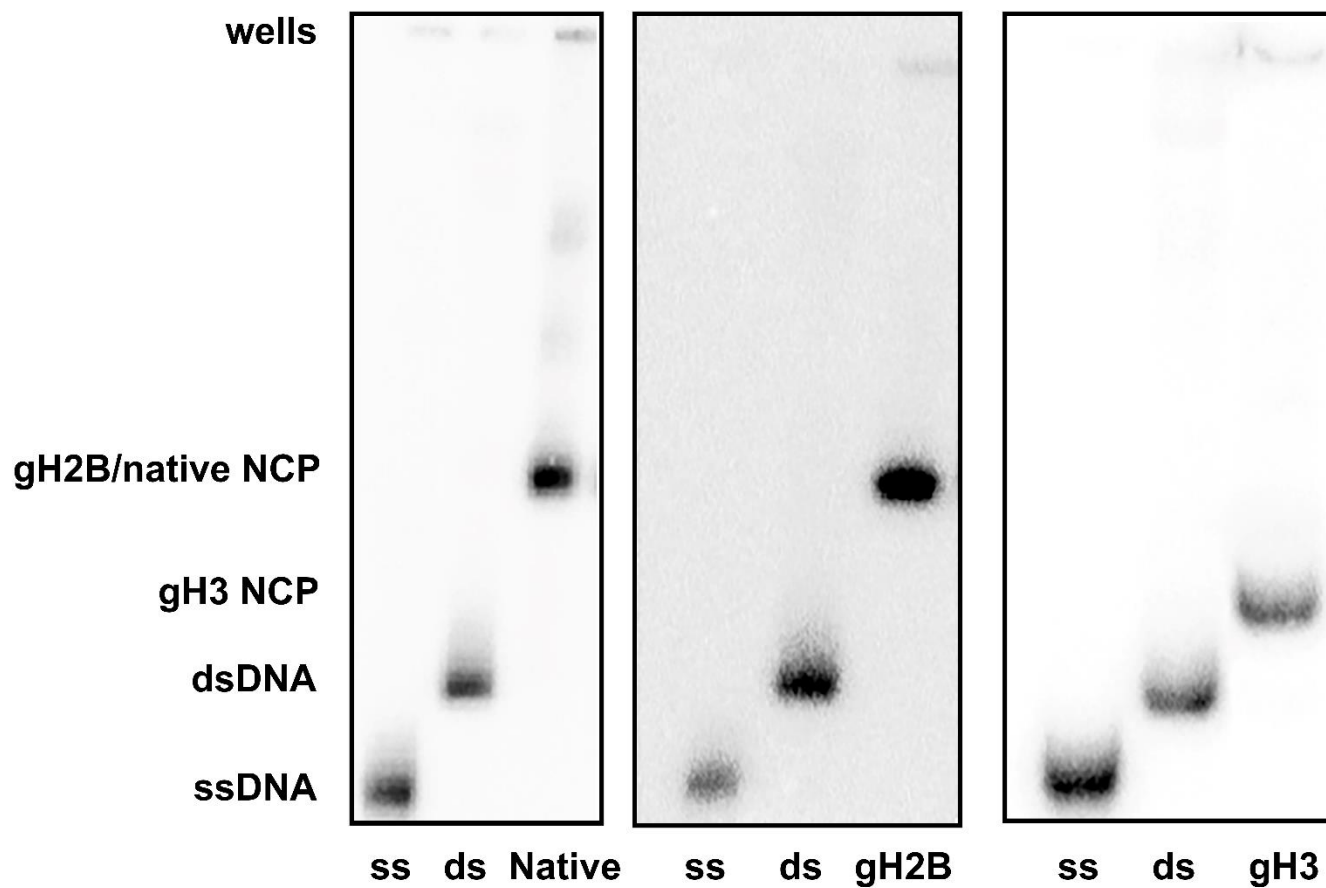

**Figure S1.** Native PAGE Analysis of  $\epsilon$ A Containing NCPs. Representative native PAGE gels showing successful NCP formation as indicated by slower band migration in the NCP lane relative to the unincorporated duplex (ds) lane. Separate gels were run for the native, gH2B, and gH3 NCPs respectively. Only NCPs containing <5% dsDNA were used in these studies.

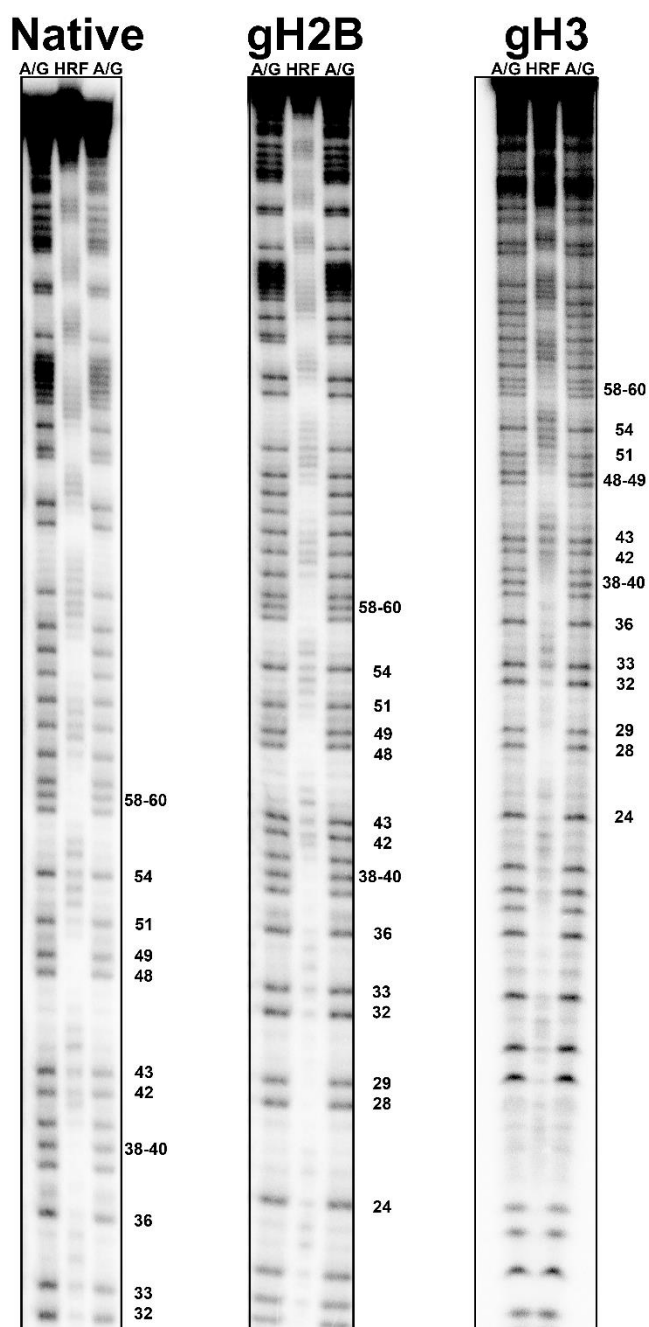

**Figure S2.** Hydroxyl Radical Footprinting of NCPs. Representative HRF denaturing PAGE gels from which rotational orientation of nucleobases was assigned. The oscillatory pattern of bands in the HRF lanes reflects the rotational position of DNA in the NCP. Quantitation of band intensity is provided in Figure 3. Lane A/G is the Maxam-Gilbert sequencing reaction (A+G) use for sequence alignment.

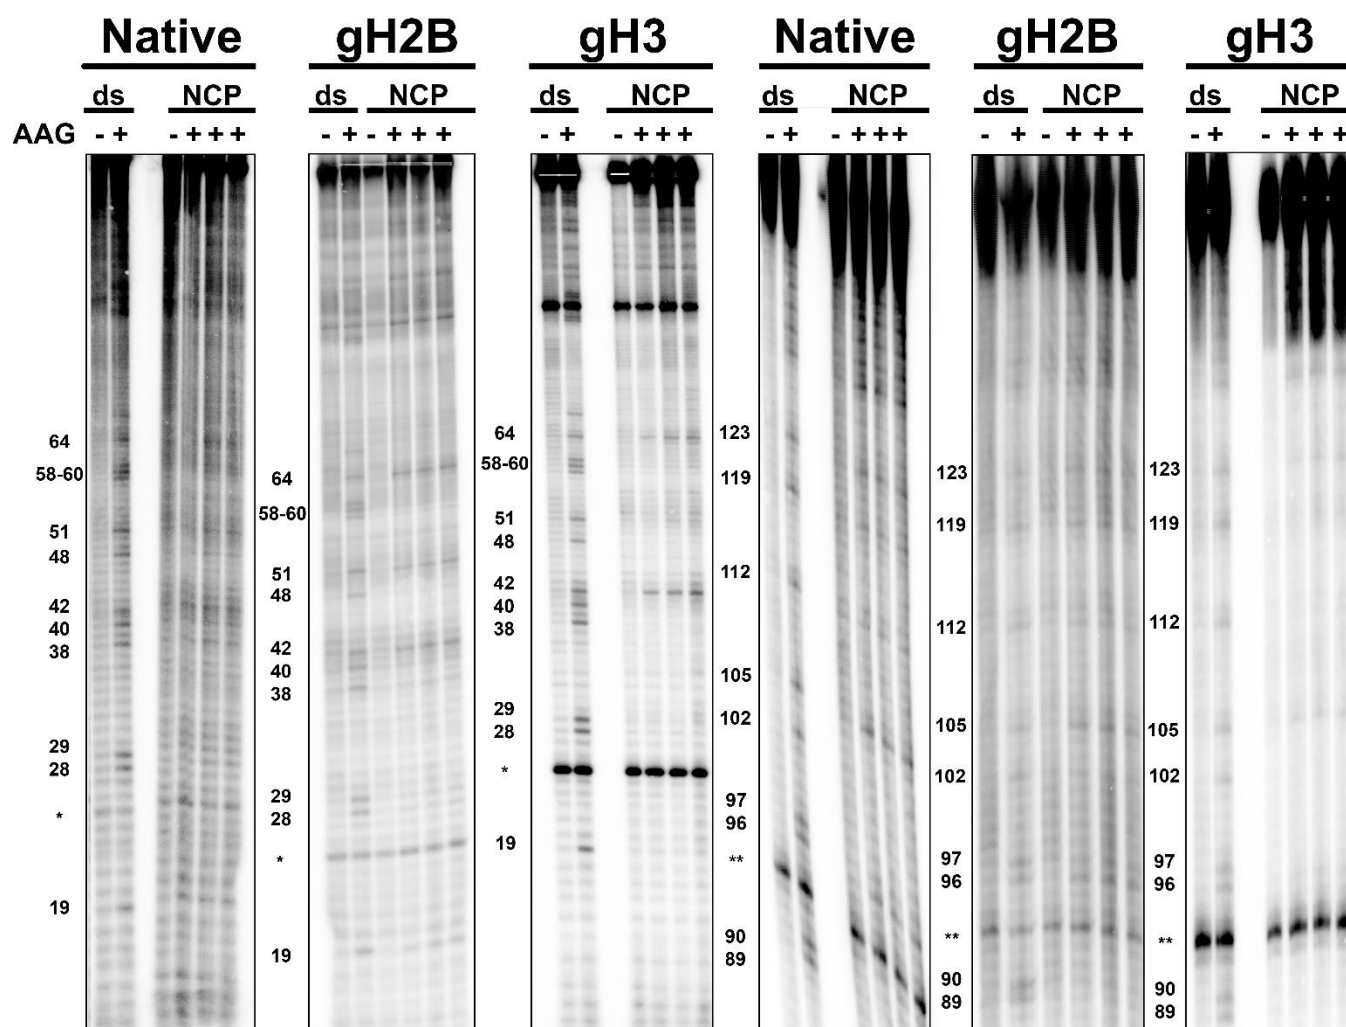

**Figure S3.** Denaturing PAGE analysis of AAG activity on NCPs and Duplex. Evaluation of AAG activity on NCPs and Duplex containing globally substituted  $\epsilon$ A lesions. All samples were incubated with 2000 nM AAG and 50 nM of either ds or NCP substrate for 1 h at 37 °C and then strand breaks were catalyzed by incubation with 0.5 M NaOH at 90 °C for 3 min to visualize successful  $\epsilon$ A excision. Each data set consists of the following lanes: a no enzyme duplex sample, duplex treated with AAG, a no enzyme NCP sample, and three replicates of AAG treated NCPs. The internal standards are indicated by the asterisks on the gel with a single asterisk and double asterisk corresponding to the 23 mer and 92 mer standards, respectively. When necessary, the PAGE images were aligned using SAFA software to correct for any slant in the gels.

**Table S1.** HRF reactivity used to assign rotational orientation of  $\epsilon$ A lesions. These values are derived from band intensities quantitated in gels provided in Figure S2.

| <b><math>\epsilon</math>A Position</b> | <b>Rotational Orientation</b> | <b>Native NCP</b> | <b>gH2B NCP</b> | <b>gH3 NCP</b> |
|----------------------------------------|-------------------------------|-------------------|-----------------|----------------|
| 19                                     | IN                            | 0.30              | 0.23            | 0.44           |
| 28                                     | IN                            | 0.11              | 0.06            | 0.05           |
| 29                                     | IN                            | 0.14              | 0.00            | 0.05           |
| 38                                     | IN                            | 0.09              | 0.28            | 0.10           |
| 40                                     | MID                           | 0.25              | 0.19            | 0.34           |
| 42                                     | OUT                           | 0.69              | 0.51            | 0.75           |
| 48                                     | IN                            | 0.08              | 0.01            | 0.00           |
| 51                                     | MID                           | 0.35              | 0.43            | 0.44           |
| 58                                     | IN                            | 0.24              | 0.24            | 0.19           |
| 59                                     | IN                            | 0.20              | 0.40            | 0.13           |
| 60                                     | IN                            | 0.18              | 0.47            | 0.23           |
| 64                                     | OUT                           | 0.78              | 0.64            | 0.77           |
| 89                                     | IN                            | 0.04              | 0.28            | 0.44           |
| 90                                     | IN                            | 0.01              | 0.24            | 0.36           |
| 96                                     | OUT                           | 0.80              | 0.57            | 0.77           |
| 97                                     | OUT                           | 0.92              | 0.72            | 0.79           |
| 102                                    | MID                           | 0.64              | 0.59            | 0.24           |
| 105                                    | MID                           | 0.49              | 0.65            | 0.65           |
| 112                                    | MID                           | 0.43              | 0.14            | 0.52           |
| 119                                    | IN                            | 0.35              | 0.32            | N/A            |
| 123                                    | OUT                           | 0.80              | 0.45            | N/A            |

## SUPPLEMENTARY REFERENCES

1. Vasudevan, D., Chua, E. Y. D., Davey, C. A. (2010) Crystal structures of nucleosome core particles containing the '601' strong positioning sequence. *J. Mol. Biol.* 403 (1), 1-10. DOI: 10.1016/j.jmb.2010.08.039
